# Supplementary material
Source: Research Square preprint supplement (doi:10.21203/rs.3.rs-8811454/v1)
Supplement: Supplementary file 1 [file c0dfe69d9362bb26bb50122b.xlsx]

## Sheet: Sheet1
Variables(At admission)	Total	SAE		Non-SAE
		SR	UR
Number of Participants	150	66	29	55
Age, median (IQR)	61(50-70.9)	61(50-73)	61.5(51.2-74)	61(49.8-72)
Sex(male), n(%)	89（59.3%）	40（63.5%）	18（62.1%）	31（56.4%）
GCS, median (IQR)	11（8-13）	10（8-12）	11（9-13）	12（10-14）
Delirium, n (%)	97（64.7%）	66（100%）	29（100%）	2（3.6%）
SOFA score, median (IQR)	4.55（4-6）	4.6（3-6）	4.59（3-6）	4.44（3-6）
APACHE II score (IQR)	15.8(12-20)	16.1(13-20)	16.9(13-21)	14.8（11-17）
Mean arterial pressure (IQR)	71.3（66-82）	69.8(65-76）	70.9（64-78）	73.3（68-80）
SpO2 (IQR)	98%（96-100%）	98%（97-99%）	97%（96-99%）	99%（98-100%）
Mechanical Ventilation，n(%)	142（94.7%）	62（93.9%）	29（100%）	51（92.7%）
Lactate, mmol/L (IQR)	12（7.6-16.9）	12.5（10.1-15.2）	15.2（12.8-18.9）	9.8（7.2-12.4）
Creatinine, umol/L (IQR)	142.4(89.6-181.9)	142.8(84.4-192.5)	151.3(93.6-224.9)	136.8(67.8-185.9)
Bilirubin, umol/L (IQR)	16.9（12.5-19.9）	17（14.9-22.6）	19.5（15.2-26.7）	15.5（11-18.6）
Renal replacement therapy, n (%)	24（16%）	12（18.2%）	6（20.7%）	6（10.9%）
