# Supplementary material
Source: Research Square preprint supplement (doi:10.21203/rs.3.rs-8811454/v1)
Supplement: Supplementary file 2 [file cd4ac6d1f6c3590f237b9304.xlsx]

## Sheet: Sheet1
Time after diagonsis	Evaluation	Group
0h		SAE(n=95)		Non-SAE(n=55)
		SR(n=66)	UR(n=29)
24h（p 0.2433）	TCD +	63	29	0
	TCD -	3	0	55
48h（p 0.0036）	TCD +	50	29	0
	TCD -	16	0	55
1w（p 0.0260）	TCD +	21	12	0
	TCD -	32	5	52
	deceased	13	12	3
2w（p 0）	TCD +	5	10	0
	TCD -	46	6	48
	deceased	15	13	7
30 days（p 0.0018）	MMSE＜27	12	10	2
	MMSE≥27	39	5	45
	deceased	15	14	8
