# Supplementary material
Source: Research Square preprint supplement (doi:10.21203/rs.3.rs-8811454/v1)
Supplement: Supplementary file 3 [file dd197330049af9a667d60fb3.xlsx]

## Sheet: Sheet1
	SR	UR	NON	P
PI	1.194±0.019	1.204±0.035	0.983±0.127	<0.001
RI	0.702±0.026	0.712±0.028	0.619±0.014	<0.001
