# Supplementary material
Source: Research Square preprint supplement (doi:10.21203/rs.3.rs-8811454/v1)
Supplement: Supplementary file 5 [file fb0a243ebf7a510ae8138131.xlsx]

## Sheet: Sheet1
PI	序号	SOFA	day0	day1	day2	day7	day14
SR	1	6	1.192	1.183	1.186	1.175	1.166
SR	2	4	1.203	1.176	1.172	1.172	0.983
SR	3	3	1.187	1.186	1.19	DC	DC
SR	4	7	1.18	1.172	1.023	0.976	1.007
SR	5	5	1.198	1.19	1.178	1.016	0.989
SR	6	2	1.208	1.178	1.181	DC	DC
SR	7	4	1.175	1.181	1.174	1.029	0.973
SR	8	6	1.211	1.013	0.992	1.032	0.97
SR	9	3	1.185	1.188	1.188	DC	DC
SR	10	5	1.194	1.17	1.17	1.178	0.998
SR	11	2	1.202	1.193	1.01	0.995	0.964
SR	12	7	1.189	1.167	1.035	0.967	1.001
SR	13	4	1.196	1.196	1.193	DC	DC
SR	14	6	1.182	1.164	1.167	1.041	0.961
SR	15	5	1.205	1.199	1.196	1.169	1.044
SR	16	3	1.177	1.161	1.038	1.001	1.004
SR	17	2	1.214	1.202	1.164	DC	DC
SR	18	7	1.2	1.168	1.199	1.18	1.16
SR	19	5	1.172	1.185	1.161	0.998	1.007
SR	20	4	1.207	1.165	1.004	1.047	0.955
SR	21	6	1.193	1.208	1.202	DC	DC
SR	22	3	1.186	0.995	1.01	1.05	0.952
SR	23	7	1.21	1.191	1.205	0.992	1.013
SR	24	2	1.179	1.169	1.208	DC	DC
SR	25	5	1.195	1.214	1.053	0.949	0.958
SR	26	4	1.204	1.146	1.211	1.182	0.989
SR	27	6	1.181	1.217	1.056	0.946	1.016
SR	28	3	1.197	1.163	1.214	1.167	0.986
SR	29	7	1.209	1.22	1.22	1.019	1.059
SR	30	2	1.178	1.16	1.223	1.184	1.167
SR	31	5	1.19	1.223	0.983	1.022	0.943
SR	32	8	1.216	1.137	1.229	DC	DC
SR	33	6	1.201	1.226	1.175	DC	DC
SR	34	3	1.184	1.134	1.062	0.94	1.025
SR	35	7	1.215	1.229	1.184	1.174	1.028
SR	36	2	1.176	1.131	0.98	1.065	0.937
SR	37	5	1.191	1.175	1.169	1.165	1.162
SR	38	4	1.217	1.184	1.192	DC	DC
SR	39	6	1.183	1.169	1.166	1.068	0.934
SR	40	3	1.199	1.192	1.195	1.182	0.931
SR	41	7	1.206	1.166	1.163	0.974	1.031
SR	42	2	1.173	1.195	1.198	1.188	1.166
SR	43	5	1.212	1.163	1.16	0.971	1.034
SR	44	4	1.188	1.198	1.201	1.17	0.928
SR	45	6	1.213	1.16	1.204	DC	DC
SR	46	3	1.174	1.181	1.207	0.968	1.037
SR	47	7	1.225	1.177	1.21	1.167	1.077
SR	48	2	1.171	0.965	1.04	1.08	0.922
SR	49	5	1.22	1.174	1.213	1.164	0.919
SR	50	4	1.165	1.207	1.196	0.962	1.043
SR	51	6	1.222	1.171	1.228	1.161	1.046
SR	52	3	1.168	1.21	1.177	0.953	0.916
SR	53	7	1.218	1.168	1.182	1.168	1.049
SR	54	2	1.169	1.213	1.092	1.089	0.913
SR	55	5	1.223	1.165	1.171	1.165	DC
SR	56	4	1.166	1.167	1.191	DC	DC
SR	57	6	1.219	1.162	1.168	0.95	1.055
SR	58	3	1.167	1.219	1.095	0.907	0.91
SR	59	7	1.224	1.169	1.194	1.162	1.058
SR	60	2	1.17	1.222	1.165	DC	DC
SR	61	5	1.221	1.17	1.197	1.173	1.061
SR	62	4	1.164	1.225	1.162	0.938	1.067
SR	63	6	1.226	1.163	1.142	1.107	0.895
SR	64	3	1.163	1.178	1.203	1.17	0.926
SR	65	7	1.227	1.17	1.206	1.178	1.119
SR	66	5	1.162	1.177	1.209	1.167	DC
UR	1	5	1.228	1.182	1.212	1.104	0.898
UR	2	4	1.161	1.171	1.215	DC	DC
UR	3	6	1.229	1.191	1.218	1.164	1.224
UR	4	3	1.16	1.168	1.221	0.941	1.064
UR	5	7	1.23	1.184	1.224	1.184	1.174
UR	6	2	1.159	1.165	1.227	DC	DC
UR	7	5	1.231	1.197	1.23	1.177	1.179
UR	8	4	1.168	1.162	1.173	1.171	1.168
UR	9	6	1.232	1.9	1.187	DC	DC
UR	10	3	1.157	1.169	1.179	DC	DC
UR	11	7	1.233	1.203	1.185	1.182	1.165
UR	12	2	1.166	1.156	1.176	DC	DC
UR	13	5	1.234	1.206	1.183	1.185	1.162
UR	14	4	1.165	1.163	1.18	1.101	0.901
UR	15	6	1.235	1.209	1.189	DC	DC
UR	16	3	1.154	1.16	1.219	1.188	0.816
UR	17	7	1.236	1.212	1.222	DC	DC
UR	18	2	1.153	1.16	1.225	DC	DC
UR	19	5	1.237	1.2	1.172	1.086	1.028
UR	20	4	1.152	1.164	1.163	DC	DC
UR	21	6	1.238	1.198	1.177	DC	DC
UR	22	3	1.171	1.161	1.182	1.176	1.167
UR	23	7	1.239	1.221	1.211	1.034	1.006
UR	24	2	1.17	1.168	1.175	1.164	1.184
UR	25	5	1.24	1.224	1.168	1.174	1.037
UR	26	4	1.169	1.165	1.172	1.187	1.177
UR	27	6	1.241	1.207	1.185	DC	DC
UR	28	3	1.168	1.132	1.19	DC	DC
UR	29	7	1.242	1.23	1.2	1.182	DC
NON	1	2	1.097
NON	2	5	0.865
NON	3	4	1.1
NON	4	6	0.862
NON	5	3	1.103
NON	6	7	0.859
NON	7	2	1.106
NON	8	5	0.856
NON	9	4	1.109
NON	10	6	0.853
NON	11	3	1.112
NON	12	7	0.85
NON	13	2	1.115
NON	14	5	0.847
NON	15	4	1.118
NON	16	6	0.844
NON	17	3	1.121
NON	18	7	0.841
NON	19	2	1.124
NON	20	5	0.838
NON	21	4	1.127
NON	22	6	0.835
NON	23	3	1.13
NON	24	7	0.832
NON	25	2	1.133
NON	26	5	0.829
NON	27	4	1.136
NON	28	6	0.826
NON	29	3	1.139
NON	30	7	0.823
NON	31	2	1.07
NON	32	5	0.892
NON	33	4	1.073
NON	34	6	0.889
NON	35	3	1.076
NON	36	7	0.886
NON	37	2	1.079
NON	38	5	0.883
NON	39	4	1.082
NON	40	6	0.88
NON	41	3	1.085
NON	42	7	0.877
NON	43	2	1.088
NON	44	5	0.874
NON	45	4	1.091

## Sheet: Sheet2
RI	序号	SOFA	day0	day1	day2	day7	day14
SR	1	6	0.703	0.667	0.693	0.683	0.688
SR	2	4	0.696	0.699	0.687	0.677	0.573
SR	3	3	0.709	0.668	0.698	DC	DC
SR	4	7	0.693	0.7	0.63	0.563	0.581
SR	5	5	0.712	0.669	0.684	0.58	0.578
SR	6	2	0.69	0.701	0.701	DC	DC
SR	7	4	0.715	0.695	0.681	0.579	0.576
SR	8	6	0.687	0.64	0.62	0.585	0.587
SR	9	3	0.718	0.692	0.704	DC	DC
SR	10	5	0.684	0.709	0.678	0.65	0.572
SR	11	2	0.721	0.689	0.64	0.582	0.574
SR	12	7	0.681	0.712	0.6	0.583	0.577
SR	13	4	0.724	0.686	0.707	DC	DC
SR	14	6	0.678	0.715	0.675	0.575	0.571
SR	15	5	0.727	0.683	0.71	0.68	0.586
SR	16	3	0.675	0.718	0.61	0.584	0.569
SR	17	2	0.73	0.68	0.672	DC	DC
SR	18	7	0.672	0.721	0.713	0.674	0.694
SR	19	5	0.733	0.677	0.669	0.568	0.588
SR	20	4	0.669	0.724	0.59	0.57	0.59
SR	21	6	0.736	0.674	0.716	DC	DC
SR	22	3	0.666	0.6	0.55	0.567	0.566
SR	23	7	0.739	0.671	0.666	0.591	0.592
SR	24	2	0.663	0.73	0.719	DC	DC
SR	25	5	0.742	0.668	0.58	0.595	0.565
SR	26	4	0.66	0.733	0.663	0.679	0.593
SR	27	6	0.745	0.665	0.596	0.562	0.564
SR	28	3	0.697	0.736	0.722	0.695	0.594
SR	29	7	0.706	0.662	0.66	0.561	0.563
SR	30	2	0.694	0.739	0.725	0.663	0.701
SR	31	5	0.711	0.659	0.597	0.56	0.598
SR	32	8	0.691	0.742	0.657	DC	DC
SR	33	6	0.716	0.697	0.728	DC	DC
SR	34	3	0.688	0.704	0.559	0.599	0.558
SR	35	7	0.719	0.694	0.689	0.665	0.6
SR	36	2	0.685	0.707	0.557	0.601	0.556
SR	37	5	0.722	0.691	0.696	0.676	0.685
SR	38	4	0.682	0.71	0.685	DC	DC
SR	39	6	0.725	0.688	0.699	0.602	0.555
SR	40	3	0.679	0.713	0.682	0.671	0.603
SR	41	7	0.728	0.685	0.702	0.554	0.604
SR	42	2	0.676	0.716	0.679	0.69	0.693
SR	43	5	0.731	0.682	0.705	0.552	0.553
SR	44	4	0.673	0.719	0.676	0.668	0.605
SR	45	6	0.734	0.679	0.708	DC	DC
SR	46	3	0.67	0.722	0.673	0.606	0.551
SR	47	7	0.737	0.676	0.711	0.699	0.607
SR	48	2	0.667	0.55	0.608	0.549	0.609
SR	49	5	0.74	0.725	0.67	0.705	0.548
SR	50	4	0.664	0.673	0.714	0.545	0.61
SR	51	6	0.743	0.728	0.667	0.659	0.547
SR	52	3	0.661	0.67	0.717	0.613	0.611
SR	53	7	0.746	0.731	0.664	0.65	0.546
SR	54	2	0.698	0.667	0.72	0.544	0.612
SR	55	5	0.705	0.734	0.661	0.684	DC
SR	56	4	0.695	0.664	0.723	DC	DC
SR	57	6	0.71	0.737	0.658	0.614	0.615
SR	58	3	0.692	0.661	0.541	0.543	0.542
SR	59	7	0.717	0.74	0.726	0.681	0.616
SR	60	2	0.689	0.698	0.688	DC	DC
SR	61	5	0.72	0.703	0.695	0.702	0.618
SR	62	4	0.686	0.696	0.686	0.617	0.539
SR	63	6	0.723	0.705	0.537	0.54	0.619
SR	64	3	0.683	0.693	0.697	0.667	0.538
SR	65	7	0.726	0.708	0.683	0.696	0.62
SR	66	5	0.68	0.69	0.7	0.664	DC
UR	1	5	0.729	0.711	0.68	0.621	0.536
UR	2	4	0.677	0.687	0.703	DC	DC
UR	3	6	0.732	0.714	0.677	0.682	0.68
UR	4	3	0.674	0.684	0.706	0.622	0.535
UR	5	7	0.735	0.717	0.674	0.68	0.661
UR	6	2	0.671	0.681	0.709	DC	DC
UR	7	5	0.738	0.72	0.671	0.687	0.675
UR	8	4	0.668	0.678	0.712	0.673	0.689
UR	9	6	0.741	0.723	0.668	DC	DC
UR	10	3	0.665	0.675	0.715	DC	DC
UR	11	7	0.744	0.726	0.665	0.657	0.707
UR	12	2	0.662	0.672	0.718	DC	DC
UR	13	5	0.747	0.729	0.662	0.66	0.704
UR	14	4	0.699	0.669	0.721	0.623	0.534
UR	15	6	0.704	0.732	0.659	DC	DC
UR	16	3	0.7	0.666	0.724	0.692	0.624
UR	17	7	0.707	0.735	0.656	DC	DC
UR	18	2	0.701	0.663	0.727	DC	DC
UR	19	5	0.708	0.738	0.69	0.533	0.625
UR	20	4	0.702	0.66	0.694	DC	DC
UR	21	6	0.713	0.741	0.691	DC	DC
UR	22	3	0.697	0.699	0.692	0.669	0.666
UR	23	7	0.714	0.702	0.71	0.532	0.529
UR	24	2	0.698	0.701	0.66	0.698	0.672
UR	25	5	0.748	0.66	0.68	0.686	0.531
UR	26	4	0.665	0.706	0.68	0.709	0.66
UR	27	6	0.749	0.727	0.68	DC	DC
UR	28	3	0.666	0.695	0.71	DC	DC
UR	29	7	0.75	0.671	0.72	0.69	DC
NON	1	2	0.618
NON	2	5	0.621
NON	3	4	0.619
NON	4	6	0.622
NON	5	3	0.617
NON	6	7	0.623
NON	7	2	0.616
NON	8	5	0.624
NON	9	4	0.615
NON	10	6	0.625
NON	11	3	0.614
NON	12	7	0.626
NON	13	2	0.613
NON	14	5	0.627
NON	15	4	0.612
NON	16	6	0.628
NON	17	3	0.611
NON	18	7	0.629
NON	19	2	0.61
NON	20	5	0.63
NON	21	4	0.609
NON	22	6	0.631
NON	23	3	0.608
NON	24	7	0.632
NON	25	2	0.607
NON	26	5	0.633
NON	27	4	0.606
NON	28	6	0.634
NON	29	3	0.605
NON	30	7	0.635
NON	31	2	0.604
NON	32	5	0.636
NON	33	4	0.603
NON	34	6	0.637
NON	35	3	0.602
NON	36	7	0.638
NON	37	2	0.601
NON	38	5	0.639
NON	39	4	0.6
NON	40	6	0.64
NON	41	3	0.599
NON	42	7	0.641
NON	43	2	0.598
NON	44	5	0.642
NON	45	4	0.597
									0.68
									0.71
									0.662
									0.686
									0.634
									0.719
									0.669
									0.697
									0.648
									0.716
									0.673
									0.703
									0.657
									0.685
									0.633
									0.735
									0.675
									0.706
									0.659
									0.692
									0.637
									0.725
									0.671
									0.702
									0.653
									0.714
									0.664
									0.693
									0.643
									0.73
									0.677
									0.707
									0.661
									0.691
									0.636
									0.721
									0.668
									0.699
									0.65
									0.718
									0.674
									0.705
									0.658
									0.682
									0.63
									0.733
									0.676
									0.704
									0.655
									0.711
									0.663
									0.694
									0.641
									0.729
									0.678
									0.709
									0.662
									0.688
									0.634
									0.72
									0.67
									0.7
									0.652
									0.717
									0.665
									0.696
									0.644
									0.728
									0.679
									0.708
									0.66
									0.689
									0.635
									0.722
									0.669
									0.698
									0.651
									0.715
									0.672
									0.703
									0.656
									0.684
									0.632
									0.734
									0.675
									0.706
									0.659
									0.693
									0.638
									0.724
									0.671
									0.702
									0.653
									0.713
									0.664
									0.695
									0.64
									0.727
									0.68
									0.71
									0.663
									0.687
									0.636
									0.719
									0.673
									0.701
									0.654
									0.712
									0.666
									0.694
									0.642
									0.726
									0.677
									0.707
									0.661
									0.69
									0.637
									0.723
									0.668
									0.699
									0.649
									0.716
									0.674
									0.705
									0.658
									0.683
									0.631
									0.737
									0.676
									0.704
									0.655
									0.711
									0.665
									0.693
									0.643
									0.729
									0.678
									0.709
									0.662
									0.689
									0.634
									0.72
									0.67
									0.7
									0.652
									0.718
									0.666
									0.697
									0.645
									0.725
									0.679
									0.708
									0.66
									0.686
									0.635
									0.721
									0.669
									0.698
									0.65
									0.714
									0.672
									0.703
									0.657
									0.685
									0.633
									0.732
									0.675
									0.706
									0.659
									0.692
									0.638
									0.724
									0.671
									0.702
									0.653
									0.713
									0.664
									0.695
									0.64
									0.728
									0.68
									0.71
									0.663
									0.688
									0.636
									0.719
									0.673
									0.701
									0.654
									0.712
									0.665
									0.694
									0.642
									0.727
									0.677
									0.707
									0.661
									0.691
									0.637
									0.723
									0.668
									0.699
									0.649
									0.717
									0.674
									0.705
									0.658
									0.682
									0.63
									0.735
									0.676
									0.704
									0.655
									0.711
									0.663
									0.693
									0.641
									0.729
									0.678
									0.709
									0.662
									0.689
									0.634
									0.72
									0.67
									0.7
									0.652
									0.718
									0.666
									0.696
									0.644
									0.726
									0.679
									0.708
									0.66
									0.687
									0.635
									0.722
									0.669
									0.698
									0.651
									0.715
									0.672
									0.703
									0.656
									0.684
									0.632
									0.734
									0.675
									0.706
									0.659
									0.692
									0.638
									0.724
									0.671
									0.702
									0.653
									0.713
									0.664
									0.695
									0.64
									0.728
									0.68
									0.71
									0.663
									0.688
									0.636
									0.719
									0.673
									0.701
									0.654
									0.712
									0.665
									0.694
									0.642
									0.727
									0.677
									0.707
									0.661
									0.691
									0.637
									0.723
									0.668
									0.699
									0.649
									0.717
									0.674
									0.705
									0.658
									0.683
									0.631
									0.736
									0.676
									0.704
									0.655
									0.711
									0.663
									0.693
									0.641
									0.729
									0.678
									0.709
									0.662
									0.689
									0.634
									0.72
									0.67
									0.7
									0.652
									0.718
									0.666
									0.696
									0.644
									0.726
									0.679
									0.708
									0.66
									0.687
									0.635
									0.722
									0.669
									0.698
									0.651
									0.715
									0.672
									0.703
									0.656
									0.684
									0.632
									0.734
									0.675
									0.706
									0.659
									0.692
									0.638
									0.724
									0.671
									0.702
									0.653
									0.713
									0.664
									0.695
									0.64
									0.728
									0.68
									0.71
									0.663
									0.688
									0.636
									0.719
									0.673
									0.701
									0.654
									0.712
									0.665
									0.694
									0.642
									0.727
									0.677
									0.707
									0.661
									0.691
									0.637
									0.723
									0.668
									0.699
									0.649
									0.717
									0.674
									0.705
									0.658
									0.683
									0.631
									0.736
									0.676
									0.704
									0.655
									0.711
									0.663
									0.693
									0.641
									0.729
									0.678
									0.709
									0.662
									0.689
									0.634
									0.72
									0.67
									0.7
									0.652
									0.718
									0.666
									0.696
									0.644
									0.726
									0.679
									0.708
									0.66
									0.687
									0.635
									0.722
									0.669
									0.698
									0.651
									0.715
									0.672
									0.703
									0.656
									0.684
									0.632
									0.734
									0.675
									0.706
									0.659
									0.692
									0.638
									0.724
									0.671
									0.702
									0.653
									0.713
									0.664
									0.695
									0.64
									0.728
									0.68
									0.71
									0.663
									0.688
									0.636
									0.719
									0.673
									0.701
									0.654
									0.712
									0.665
									0.694
									0.642
									0.727
									0.677
									0.707
									0.661
									0.691
									0.637
									0.723
									0.668
									0.699
									0.649
									0.717
									0.674
									0.705
									0.658
									0.683
									0.631
									0.736
									0.676
									0.704
									0.655
									0.711
									0.663
									0.693
									0.641
									0.729
									0.678
									0.709
									0.662
									0.689
									0.634
									0.72
									0.67
									0.7
									0.652
									0.718
									0.666
									0.696
									0.644
									0.726
									0.679
									0.708
									0.66
									0.687
									0.635
									0.722
									0.669
									0.698
									0.651
									0.715
									0.672
									0.703
									0.656
									0.684
									0.632
									0.734
									0.675
									0.706
									0.659
									0.692
									0.638
									0.724
									0.671
									0.702
									0.653
									0.713
									0.664
									0.695
									0.64
									0.728
									0.68
									0.71
									0.663
									0.688
									0.636
									0.719
									0.673
									0.701
									0.654
									0.712
									0.665
									0.694
									0.642
									0.727
									0.677
									0.707
									0.661
									0.691
									0.637
									0.723
									0.668
									0.699
									0.649
									0.717
									0.674
									0.705
									0.658
									0.683
									0.631
									0.736
									0.676
									0.704
									0.655
									0.711
									0.663
									0.693
									0.641
									0.729
									0.678
									0.709
									0.662
									0.689
									0.634
									0.72
									0.67
									0.7
									0.652
									0.718
									0.666
									0.696
									0.644
									0.726
									0.679
									0.708
									0.66
									0.687
									0.635
									0.722
									0.669
									0.698
									0.651
									0.715
									0.672
									0.703
									0.656
									0.684
									0.632
									0.734
									0.675
									0.706
									0.659
									0.692
									0.638
									0.724
									0.671
									0.702
									0.653
									0.713
									0.664
									0.695
									0.64
									0.728
									0.68
									0.71
									0.663
									0.688
									0.636
									0.719
									0.673
									0.701
									0.654
									0.712
									0.665
									0.694
									0.642
									0.727
									0.677
									0.707
									0.661
									0.691
									0.637
									0.723
									0.668
									0.699
									0.649
									0.717
									0.674
									0.705
									0.658
									0.683
									0.631
									0.736
									0.676
									0.704
									0.655
									0.711
									0.663
									0.693
									0.641
									0.729
									0.678
									0.709
									0.662
									0.689
									0.634
									0.72
									0.67
									0.7
									0.652
									0.718
									0.666
									0.696
									0.644
									0.726
									0.679
									0.708
									0.66
									0.687
									0.635
									0.722
									0.669
									0.698
									0.651
									0.715
									0.672
									0.703
									0.656
									0.684
									0.632
									0.734
									0.675
									0.706
									0.659
									0.692
									0.638
									0.724
									0.671
									0.702
									0.653
									0.713
									0.664
									0.695
									0.64
									0.728
									0.68
									0.71
									0.663
									0.688
									0.636
									0.719
									0.673
									0.701
									0.654
									0.712
									0.665
									0.694
									0.642
									0.727
									0.677
									0.707
									0.661
									0.691
									0.637
									0.723
									0.668
									0.699
									0.649
									0.717
									0.674
									0.705
									0.658
									0.683
									0.631
									0.736
									0.676
									0.704
									0.655
									0.711
									0.663
									0.693
									0.641
									0.729
									0.678
									0.709
									0.662
									0.689
									0.634
									0.72
									0.67
									0.7
									0.652
									0.718
									0.666
									0.696
									0.644
									0.726
									0.679
									0.708
									0.66

## Sheet: Sheet3
		PI						RI
	SR	UR	T	P			SR	UR	T	P
Day0	1.194±0.019	1.204±0.035	-1.37	0.175		Day0	0.702±0.026	0.712±0.028	-1.315	0.193
Day1	1.17±0.051	1.185±0.022	-1.089	0.28		Day1	0.693±0.035	0.701±0.024	-0.898	0.372
Day2	1.143±0.077	1.195±0.023	-2.695	0.009		Day2	0.66±0.053	0.688±0.021	-2.057	0.044
Day7	1.072±0.094	1.139±0.07	-2.615	0.011		Day7	0.618±0.054	0.652±0.054	-2.163	0.034
Day14	1.009±0.073	1.084±0.125	-3	0.004		Day14	0.592±0.041	0.627±0.069	-2.477	0.016

## Sheet: Sheet4
	SR	UR	NON	F	P
PI	1.194±0.019	1.204±0.035	0.983±0.127	88.637	<0.001
RI	0.702±0.026	0.712±0.028	0.619±0.014	198.76	<0.001
